# Supplementary material for: Multicentric, observational, longitudinal study for the evaluation of nutritional management implications in newly diagnosed Italian cancer patients: the Italian Registry of Malnutrition in Oncology (IRMO)
Source: PubMed Central journal article supplement — BMJ Open. 2023 Aug 21;13(8):e071858. doi: 10.1136/bmjopen-2023-071858 (PMC10445343; doi:10.1136/bmjopen-2023-071858), 2023-08-21
Supplement: bmjopen-2023-071858.reviewer_comments.pdf [file bmjopen-2023-071858.reviewer_comments.pdf]

## PEER REVIEW HISTORY

BMJ Open publishes all reviews undertaken for accepted manuscripts. Reviewers are asked to complete a checklist review form (<http://bmjopen.bmj.com/site/about/resources/checklist.pdf>) and are provided with free text boxes to elaborate on their assessment. These free text comments are reproduced below.

### ARTICLE DETAILS

|                            |                                                                                                                                                                                                                                                                                                           |
|----------------------------|-----------------------------------------------------------------------------------------------------------------------------------------------------------------------------------------------------------------------------------------------------------------------------------------------------------|
| <b>TITLE (PROVISIONAL)</b> | MULTICENTRIC, OBSERVATIONAL, LONGITUDINAL STUDY FOR THE EVALUATION OF NUTRITIONAL MANAGEMENT IMPLICATIONS IN NEWLY DIAGNOSED ITALIAN CANCER PATIENTS: THE ITALIAN REGISTRY OF MALNUTRITION IN ONCOLOGY (IRMO)                                                                                             |
| <b>AUTHORS</b>             | Bosetti, Cristina; Casirati, Amanda; Da Prat, Valentina; Masi, Sara; Crotti, Silvia; Ferrari, Alessandra; Perrone, Lorenzo; Serra, Francesco; Santucci, Claudia; Cereda, Emanuele; Iannelli, Elisabetta; De Lorenzo, Francesco; Pedrazzoli, Paolo; Caccialanza, R; IRMO Collaborators, IRMO Collaborators |

### VERSION 1 – REVIEW

|                        |                                                 |
|------------------------|-------------------------------------------------|
| <b>REVIEWER</b>        | Knapp, Guido<br>Technische Universität Dortmund |
| <b>REVIEW RETURNED</b> | 07-Mar-2023                                     |

|                         |                                                                                                                                                                                                                                                                                                                                                                                                                                                                                                                                                                                                                                  |
|-------------------------|----------------------------------------------------------------------------------------------------------------------------------------------------------------------------------------------------------------------------------------------------------------------------------------------------------------------------------------------------------------------------------------------------------------------------------------------------------------------------------------------------------------------------------------------------------------------------------------------------------------------------------|
| <b>GENERAL COMMENTS</b> | <p>The study protocol is clearly written. I have just one question. At the end of the section on Statistical methods and sample size, the author discuss power and sample size. I think I understand the assumptions of 75% survival rate and the ratio 2.3 between all patients and malnourished patients. What does then the hazard ratio 1.36 mean? I think the increase of surviving in the group of non-malnourished patients. Correct? But I do not understand the 0.66% explanation in the following sentence given in brackets.</p> <p>Small typo:<br/>Page 8, first line: I guess the second "are" must be deleted.</p> |
|-------------------------|----------------------------------------------------------------------------------------------------------------------------------------------------------------------------------------------------------------------------------------------------------------------------------------------------------------------------------------------------------------------------------------------------------------------------------------------------------------------------------------------------------------------------------------------------------------------------------------------------------------------------------|

|                        |                                                               |
|------------------------|---------------------------------------------------------------|
| <b>REVIEWER</b>        | Salama, Amany<br>Pharos University, Nutrition and food safety |
| <b>REVIEW RETURNED</b> | 23-Apr-2023                                                   |

|                         |                                                              |
|-------------------------|--------------------------------------------------------------|
| <b>GENERAL COMMENTS</b> | The dates of the study should be included in the manuscript. |
|-------------------------|--------------------------------------------------------------|

|                        |                                                                       |
|------------------------|-----------------------------------------------------------------------|
| <b>REVIEWER</b>        | Bowrey, David<br>University Hospitals of Leicester NHS Trust, Surgery |
| <b>REVIEW RETURNED</b> | 04-May-2023                                                           |

|                         |                                                                                                                                                                                     |
|-------------------------|-------------------------------------------------------------------------------------------------------------------------------------------------------------------------------------|
| <b>GENERAL COMMENTS</b> | This is a well written study protocol for a longitudinal study looking at nutrition in Oncology patients. This will be a valuable contribution to the understanding of this process |
|-------------------------|-------------------------------------------------------------------------------------------------------------------------------------------------------------------------------------|

## VERSION 1 – AUTHOR RESPONSE

Reviewer: 1

Dr. Guido Knapp, Technische Universität Dortmund

Comments to the Author:

The study protocol is clearly written. I have just one question. At the end of the section on Statistical methods and sample size, the author discuss power and sample size. I think I understand the assumptions of 75% survival rate and the ratio 2.3 between all patients and malnourished patients. What does then the hazard ratio 1.36 mean? I think the increase of surviving in the group of non-malnourished patients. Correct? But I do not understand the 0.66% explanation in the following sentence given in brackets.

>>In the Methods, we modified the sentence on the sample size in order to make it clearer.

Small typo:

Page 8, first line: I guess the second "are" must be deleted.

>>We corrected the typo.

Reviewer: 2

Dr. Amany Salama, Pharos University

Comments to the Author:

The dates of the study should be included in the manuscript.

>>As suggested also by the Editor, in the Methods we indicated the planned dates for the study.

Reviewer: 3

Dr. David Bowrey, University Hospitals of Leicester NHS Trust

Comments to the Author:

This is a well written study protocol for a longitudinal study looking at nutrition in Oncology patients.

This will be a valuable contribution to the understanding of this process

>>Thank you for your positive comment.
